# Supplementary material
Source: MDPI journal article supplement (https://www.mdpi.com/2673-7159/2/2/25)

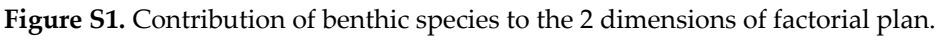

**Figure S1.** Contribution of benthic species to the 2 dimensions of factorial plan.

Supplement: s1 [file s1 › conservation-1717080-supplementary.pdf]
